# Supplementary material for: Tidal influences on a future evolution of the Filchner–Ronne Ice Shelf cavity in the Weddell Sea, Antarctica
Source: Copernicus journal article supplement (doi:10.5194/tc-12-453-2018), 2018-02-06
Supplement: Supplementary file 1 [file tc-12-453-2018-supplement.pdf]

Supplement of The Cryosphere, 12, 453–476, 2018  
<https://doi.org/10.5194/tc-12-453-2018-supplement>  
© Author(s) 2018. This work is distributed under  
the Creative Commons Attribution 4.0 License.

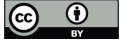

*Supplement of*

## **Tidal influences on a future evolution of the Filchner–Ronne Ice Shelf cavity in the Weddell Sea, Antarctica**

**Rachael D. Mueller et al.**

*Correspondence to:* Rachael D. Mueller ([mueller@esr.org](mailto:mueller@esr.org))

The copyright of individual parts of the supplement might differ from the CC BY 4.0 License.

Supplement:

ROMS Model Paramter selection Physical Parameters, Grid: 01

=====

|          |             |                                                                                      |
|----------|-------------|--------------------------------------------------------------------------------------|
| 3153600  | ntimes      | Number of timesteps for 3-D equations.                                               |
| 200      | dt          | Timestep size (s) for 3-D equations.                                                 |
| 30       | ndtfast     | Number of timesteps for 2-D equations between each 3D timestep.                      |
| 1        | ERstr       | Starting ensemble/perturbation run number.                                           |
| 1        | ERend       | Ending ensemble/perturbation run number.                                             |
| 0        | nrrec       | Number of restart records to read from disk.                                         |
| T        | LcycleRST   | Switch to recycle time-records in restart file.                                      |
| 12960    | nRST        | Number of timesteps between the writing of data into restart fields.                 |
| 40       | ninfo       | Number of timesteps between print of information to standard output.                 |
| T        | ldefout     | Switch to create a new output NetCDF file(s).                                        |
| 157680   | nHIS        | Number of timesteps between the writing fields into history file.                    |
| 1        | ntsAVG      | Starting timestep for the accumulation of output time-averaged data.                 |
| 12960    | nAVG        | Number of timesteps between the writing of time-averaged data into averages file.    |
| 157680   | ndefAVG     | Number of timesteps between creation of new time-averaged file.                      |
| 2000000  | ntsDIA      | Starting timestep for the accumulation of output time-averaged diagnostics data.     |
| 2000000  | nDIA        | Number of timesteps between the writing of time-averaged data into diagnostics file. |
| 1.00E+00 | nl_tnu2(01) | NLM Horizontal, harmonic mixing coefficient (m <sup>2</sup> /s) for tracer 01: temp  |
| 1.00E+00 | nl_tnu2(02) | NLM Horizontal, harmonic mixing coefficient (m <sup>2</sup> /s) for tracer 02: salt  |
| 5.00E+00 | nl_visc2    | NLM Horizontal, harmonic mixing coefficient (m <sup>2</sup> /s) for momentum.        |
| 1.00E-05 | Akt_bak(01) | Background vertical mixing coefficient (m <sup>2</sup> /s) for tracer 01: temp       |
| 1.00E-05 | Akt_bak(02) | Background vertical mixing coefficient (m <sup>2</sup> /s) for tracer 02: salt       |
| 5.00E-05 | Akv_bak     | Background vertical mixing coefficient (m <sup>2</sup> /s) for momentum.             |
| 3.00E-04 | rdrq        | Linear bottom drag coefficient (m/s).                                                |
| 2.50E-03 | rdrq2       | Quadratic bottom drag coefficient.                                                   |

|          |             |                                                                                     |
|----------|-------------|-------------------------------------------------------------------------------------|
| 2.00E-02 | Zob         | Bottom roughness (m).                                                               |
| 1        | lmd_jwt     | Jerlov water type.                                                                  |
| 2        | Vtransform  | S-coordinate transformation equation.                                               |
| 4        | Vstretching | S-coordinate stretching function.                                                   |
| 1.00E-01 | theta_s     | S-coordinate surface control parameter.                                             |
| 1.00E+00 | theta_b     | S-coordinate bottom control parameter.                                              |
| 1000     | Tcline      | S-coordinate surface/bottom layer width (m) used in vertical coordinate stretching. |
| 1025     | rho0        | Mean density (kg/m <sup>3</sup> ) for Boussinesq approximation.                     |
| 0        | dstart      | Time-stamp assigned to model initialization (days).                                 |
| 0        | tide_start  | Reference time origin for tidal forcing (days).                                     |
| 19900101 | time_ref    | Reference time for units attribute (yyyymmdd.dd)                                    |
| 2.00E+01 | Tnudg(01)   | Nudging/relaxation time scale (days) for tracer 01: temp                            |
| 2.00E+01 | Tnudg(02)   | Nudging/relaxation time scale (days) for tracer 02: salt                            |
| 0.00E+00 | Znudg       | Nudging/relaxation time scale (days) for free-surface.                              |
| 0.00E+00 | M2nudg      | Nudging/relaxation time scale (days) for 2D momentum.                               |
| 1.00E+02 | M3nudg      | Nudging/relaxation time scale (days) for 3D momentum.                               |
| 1.00E+01 | obcfac      | Factor between passive and active open boundary conditions.                         |
| F        | VolCons(1)  | NLM western edge boundary volume conservation.                                      |
| F        | VolCons(2)  | NLM southern edge boundary volume conservation.                                     |
| F        | VolCons(3)  | NLM eastern edge boundary volume conservation.                                      |
| F        | VolCons(4)  | NLM northern edge boundary volume conservation.                                     |
| -1.9     | T0          | Background potential temperature (C) constant.                                      |
| 34.65    | S0          | Background salinity (PSU) constant.                                                 |
| 1        | gamma2      | Slipperiness variable: free-slip (1.0) or no-slip (-1.0).                           |

Tile partition information for Grid 01: 0205x0211x0024 tiling: 008x004

Lateral Boundary Conditions: NLM

=====

| Variable | Grid | West Edge | South Edge | East Edge | North Edge |
|----------|------|-----------|------------|-----------|------------|
| zeta     | 1    | Chapman   | Closed     | Chapman   | Chapman    |
| ubar     | 1    | Flather   | Closed     | Flather   | Flather    |
| vbar     | 1    | Flather   | Closed     | Flather   | Flather    |
| u        | 1    | Radiation | Closed     | Radiation | Radiation  |
| v        | 1    | Radiation | Closed     | Radiation | Radiation  |
| temp     | 1    | Rad + Nud | Closed     | Rad + Nud | Rad + Nud  |
| salt     | 1    | Rad + Nud | Closed     | Rad + Nud | Rad + Nud  |

Activated C-preprocessing Options:

=====

|               |                                                   |
|---------------|---------------------------------------------------|
| WS            | ROMS/TOMS 3.6 - WS sub                            |
| ADD_FSOBC     | Adding tidal elevation to processed OBC data.     |
| ADD_M2OBC     | Adding tidal currents to processed OBC data.      |
| ANA_BSFLUX    | Analytical kinematic bottom salinity flux.        |
| ANA_BTFLUX    | Analytical kinematic bottom temperature flux.     |
| ANA_FSOBC     | Analytical free-surface boundary conditions.      |
| ANA_INITIAL   | Analytical initial conditions.                    |
| ANA_M2OBC     | Analytical 2D momentum boundary conditions.       |
| ANA_M3OBC     | Analytical 3D momentum boundary conditions.       |
| ANA_SMFLUX    | Analytical kinematic surface momentum flux.       |
| ANA_SRFLUX    | Analytical kinematic shortwave radiation flux.    |
| ANA_SSFLUX    | Analytical kinematic surface salinity flux.       |
| ANA_STFLUX    | Analytical kinematic surface temperature flux.    |
| ASSUMED_SHAPE | Using assumed-shape arrays.                       |
| AVERAGES      | Writing out time-averaged nonlinear model fields. |
| CURVGRID      | Orthogonal curvilinear grid.                      |

|                  |                                                         |
|------------------|---------------------------------------------------------|
| DIAGNOSTICS_TS   | Computing and writing tracer diagnostic terms.          |
| DJ_GRADPS        | Parabolic Splines density Jacobian (Shchepetkin, 2002). |
| DOUBLE_PRECISION | Double precision arithmetic.                            |
| ICESHELF         | Include Ice Shelf Cavities.                             |
| ICESHELF_3EQ     | Include 3eq Ice Shelf Thermodynamics.                   |
| LMD_CONVEC       | LMD convective mixing due to shear instability.         |
| LMD_MIXING       | Large/McWilliams/Doney interior mixing.                 |
| LMD_NONLOCAL     | LMD convective nonlocal transport.                      |
| LMD_RIMIX        | LMD diffusivity due to shear instability.               |
| LMD_SKPP         | KPP surface boundary layer mixing.                      |
| MASKING          | Land/Sea masking.                                       |
| MIX_GEO_TS       | Mixing of tracers along geopotential surfaces.          |
| MIX_S_UV         | Mixing of momentum along constant S-surfaces.           |
| MPI              | MPI distributed-memory configuration.                   |
| NONLINEAR        | Nonlinear Model.                                        |
| NONLIN_EOS       | Nonlinear Equation of State for seawater.               |
| PERFECT_RESTART  | Processing perfect restart variables.                   |
| POWER_LAW        | Power-law shape time-averaging barotropic filter.       |
| PROFILE          | Time profiling activated .                              |
| RAMP_TIDES       | Ramping tidal forcing for one day.                      |
| !RST_SINGLE      | Double precision fields in restart NetCDF file.         |
| SALINITY         | Using salinity.                                         |
| SOLVE3D          | Solving 3D Primitive Equations.                         |
| SPLINES          | Conservative parabolic spline reconstruction.           |
| SSH_TIDES        | Add tidal elevation to SSH climatology.                 |
| TS_U3HADVECTION  | Third-order upstream horizontal advection of tracers.   |
| TS_C4VADVECTION  | Fourth-order centered vertical advection of tracers.    |
| TS_DIF2          | Harmonic mixing of tracers.                             |
| UV_ADV           | Advection of momentum.                                  |
| UV_COR           | Coriolis term.                                          |

|                 |                                                           |
|-----------------|-----------------------------------------------------------|
| UV_U3HADVECTION | Third-order upstream horizontal advection of 3D momentum. |
| UV_C4VADVECTION | Fourth-order centered vertical advection of momentum.     |
| UV_QDRAG        | Quadratic bottom stress.                                  |
| UV_TIDES        | Add tidal currents to 2D momentum climatologies.          |
| UV_VIS2         | Harmonic mixing of momentum.                              |
| VAR_RHO_2D      | Variable density barotropic mode.                         |
